bioRxiv preprint doi: <https://doi.org/10.1101/2020.09.17.301010>; this version posted September 17, 2020. The copyright holder for this preprint (which was not certified by peer review) is the author/funder. All rights reserved. No reuse allowed without permission.

## 28 Introduction

29 Locusts are best known for their devastating potential to cause immense damage to  
 30 vegetation and crops. These short-horned grasshoppers (Orthoptera), belonging to the  
 31 family Acrididae, frequently aggregate and migrate in swarms, decimating to crops over  
 32 large areas of the developing world [1–4]. All locust species may express two very  
 33 different density-dependent phenotypes (or phases): at low densities (the solitary  
 34 phase), locusts behave in a cryptic manner, actively avoiding interaction with  
 35 conspecifics and generally not posing a serious threat to crops. When crowded,  
 36 however, locusts express the notorious gregarious phenotype, tending to aggregate into  
 37 swarms, to migrate, and to consume huge amounts of vegetation, thus causing severe  
 38 damage to agriculture (gregarious phase) [1,3,5,6]. The phase transition from solitary  
 39 to gregarious in the different locust species encompasses many changes, including a  
 40 marked behavioral change [5–8], as well as immense physiological changes[5,6,9,10].

41 Among studies investigating the different characteristics of the locust density-  
 42 dependent phase phenomenon, very few have addressed the microbiome-related  
 43 aspects. The role of gut bacteria in maintaining swarm integrity, through the emission  
 44 of locust-attracting fecal volatiles, was suggested by Dillon et al. [11,12]. Recently,  
 45 Lavy et al. [13,14] reported the occurrence of different temporal dynamics in bacterial  
 46 composition of the gut and the reproductive tract in the desert locust (*Schistocerca*  
 47 *gregaria*). No study to date, however, has directly addressed the bacterial composition-  
 48 related aspects of the locust density-dependent phase-transition.

49 Recent studies have revealed mechanisms by which the microbiome can affect its host  
 50 behavior [15,16], including insects [17,18]. Other studies have explored the  
 51 evolutionary perspective of microbiome-induced social interactions [19–21]. In the  
 52 current controlled laboratory study we used the desert locust (*Schistocerca gregaria*)  
 53 as a model with which we directly explore the association between solitary-to-  
 54 gregarious phase transition and the individual locust’s microbiome. We further  
 55 constructed a mathematical model with which we examined the conditions that may  
 56 favor the evolution of microbial species that induce aggregation behavior in their host.  
 57 We found that microbes with an advantage in horizontal transmission would benefit  
 58 from inducing increased interaction rates and aggregation in their hosts, thus improving

transmission potential. This in turn would result in locust crowding and, in parallel with changes in population density, could facilitate the locust swarming behavior.

## Methods

### *Insect rearing*

To obtain locusts in either the solitary or the gregarious phase, locusts were reared from up to 2h post-hatching in either solitary or crowded conditions. The gregarious and the solitary locusts were maintained in different, climate-controlled rooms, under similar ambient conditions except for density (detailed in Lavy et al.[13]). Briefly, light (10D:14L cycle) and radiant heat were supplied by electric bulbs, allowing the insect's behavioral thermoregulation between 30 - 37°C. All locusts were fed daily with fresh wheat seedlings and dry oats.

### *Experimental setup*

We first sampled the gut and integument bacterial composition of mature solitary-reared males and females ( $t=0$ ). We then transferred the locusts (marked individually with acrylic color on their pronotum, hind femur, and wings) to heavy crowding conditions, i.e. introducing them into a 65 liter metal cage, containing ~200 conspecifics of similar-age, crowded-reared locusts (simulating the locust transition from solitary conditions to swarm conditions;  $t=7$ ). On day 7 post-transfer, we repeated the sampling of the same individuals. The crowded-reared gregarious individuals were sampled the same way and at the same time as control.

### *Sampling*

The abdomen of mature individuals of both phases was swabbed (Heinz Herenz, Hamburg, Germany), followed by inserting each locust head first into a sterile 50 ml centrifuge tube (Corning, NY, United States) for 3 h, to collect its fecal pellets. This setup prevented the insects from moving, and ensured the collection of uncontaminated feces from each individual. Swab samples and the fecal pellets were marked as " $t=0$ "

and kept in -80 C° until DNA extraction. Re-sampling was conducted in the same manner; samples were marked "t=7" and stored at -80 C° until further use.

### ***DNA extraction and sequencing***

Bacterial DNA was extracted using the "Powersoil" DNA isolation kit (Mo Bio Laboratories Inc., Carlsbad CA, United States) following the manufacturer's instructions, using 60 µl for final DNA elution. To determine the bacterial composition of the different samples, a polymerase chain reaction (PCR) was applied with universal primers 5' end common sequences (CS1-341F 5'-ACACTGACGACATGGTTCTACANNNCCTACGGGAGGC AGCAG and CS2-806R 5'-TACGGTAGCAGAGACTTGG TCTGGACTACHVGGGTW TCTAAT), amplifying the variable regions 3 and 4 of the prokaryotic 16S rRNA gene. The PCR conditions were one cycle of 95 C° for 3 min, followed by 31 cycles of 95 C° 15 s, 55 C° 15 s, 72 C° 5 s; using the PCR master mix KAPA2G Fast™ (KAPA Biosystems, Wilmington MA, United States). Amplified products were visually verified, and sent for deep sequencing on an Illumina MiSeq platform at the Chicago Sequencing Center of the University of Illinois.

DNA was also extracted according to the protocol above from two clean swab sticks as a control. Visual validation showed no PCR product in these samples.

### ***Data analyses***

De-multiplexed raw sequences were quality filtered (bases with a PHRED score < 20 were removed) and merged using PEAR (Zhang et al. 2014). Sequences of less than 380 bp (after merging and trimming) were discarded. Data were then analyzed using the Quantitative Insights Into Microbial Ecology (QIIME) package (Caporaso et al. 2010). Vsearch (Rognes et al. 2016) was used for chimera detection and elimination. Merged and trimmed data were additionally analyzed with the DADA2 pipeline (Callahan et al. 2016) to infer exact sequences for amplicon sequence variant (ASV) analyses, and taxonomy assignment was performed using the Silva database (version 128). To ensure data evenness, before analysis the data were rarefied to 2500 seqs/sample. All statistical analyses were conducted using "R" v.3.4.1. (R Core Team,

2013). Canonical analysis of principal coordinates and Analysis of similarities (ANOSIM) were carried out using the “vegan 2.4-3” package, (function used: “capscale”). Kruskal-Wallis rank sum test was conducted using the “stats 3.6.1” package, and Dunn's test was conducted using the “dunn.test 1.3.5” package.

### ***Mathematical model description***

We modeled a fully-mixed population of locusts, each bearing one of three microbiome compositions. We used a compartmental model that describes the change in the frequencies of the different microbiome compositions in the population over time. Denoted by  $S$  are locusts bearing a standard solitary microbiome composition. Denoted by  $\alpha$  are locusts bearing, in addition to the standard microbiome, also microbes of type  $\alpha$  that induce their hosts to aggregate, namely, to initiate more interactions. We denote by  $g \geq 1$  the factor that controls the fold-increase in the rate of interactions of locusts bearing microbes of type  $\alpha$ . Denoted by  $\beta$  are locusts bearing, in addition to the standard microbiome, also microbes of type  $\beta$ , which do not affect their host's behavior.

During interactions between locusts, microbes  $\alpha$  and  $\beta$  can be transmitted from one locust to another with probabilities  $T_\alpha, T_\beta$ . We assume that  $\alpha$  and  $\beta$  cannot co-reside within one host, and thus in interactions between an  $\alpha$ -carrying host and a  $\beta$ -carrying host, transmission of the  $\alpha$  microbes would result in replacement of the residing  $\beta$  microbes with the transmitted microbes, and vice versa for  $\beta$  to  $\alpha$  transmission. We assume that the hosts bearing  $\alpha/\beta$  microbes can restore their solitary microbiome and lose  $\alpha/\beta$  at the corresponding rates  $L_\alpha, L_\beta$ . We focus here on the cases in which  $\alpha$  microbes have a higher transmission rate than  $\beta$  microbes ( $T_\alpha > T_\beta$ ), and a lower persistence within the microbiome ( $L_\alpha > L_\beta$ ).

We further account for increase and decrease in *all* rates of interactions due to changes in population density, denoted by  $D$ . Finally, we include low rates of mutation in all directions:  $S \leftrightarrow \alpha$ ,  $S \leftrightarrow \beta$ , and  $\alpha \leftrightarrow \beta$ . For simplicity, we assume a constant mutation rate of  $\mu$  in all directions.

The following three differential equations represent the dynamics in the population (see Fig.3a and Supplementary Information for analysis of the system):

149

$$150 \quad 1. \quad \frac{d\alpha}{dt} = \alpha \cdot S \cdot D \cdot g \cdot T_{\alpha} + \alpha \cdot \beta \cdot D \cdot g \cdot (T_{\alpha} - T_{\beta}) - \alpha \cdot L_{\alpha} + \mu \cdot (S + \beta - 2 \cdot \alpha)$$

$$151 \quad 2. \quad \frac{d\beta}{dt} = \beta \cdot S \cdot D \cdot T_{\beta} + \beta \cdot \alpha \cdot D \cdot g \cdot (T_{\beta} - T_{\alpha}) - \beta \cdot L_{\beta} + \mu \cdot (\alpha + S - 2 \cdot \beta)$$

$$152 \quad 3. \quad \frac{dS}{dt} = -S \cdot \alpha \cdot D \cdot g \cdot T_{\alpha} - S \cdot \beta \cdot D \cdot T_{\beta} + \alpha \cdot L_{\alpha} + \beta \cdot L_{\beta} + \mu \cdot (\alpha + \beta - 2 \cdot S)$$

153

154

## 155 **Results**

### 156 *Gregarious and solitary locust bacterial composition analysis*

157 We successfully sequenced the integument and gut bacterial composition of 21 solitary  
158 locusts, before and after crowding them, and compared these to the integument and gut  
159 bacterial composition of 21 crowd-reared gregarious locusts. We found that the  
160 microbiome of the gregarious and solitary feces samples is comprised primarily of  
161 members of the Proteobacteria and Firmicutes (Fig.1a). The locust-integument also  
162 featured a representation of Actinobacteria and Bacteroidetes (Fig.1b).

163 We observed that while the bacterial composition of the solitary locusts was very  
164 different from that of the gregarious control group at t=0, these differences had  
165 diminished by t=7. This noted shift in the solitary gut and integument bacterial  
166 composition could mostly be attributed to an increase in Firmicutes during the seven  
167 days of gregarious crowding (Fig. 1).

168 This trend of solitary-to-gregarious bacterial shift was also observed at the genus level:  
169 the integument bacterial composition of the solitary locusts notably differed from that  
170 of the gregarious locusts at t=0 days (ANOSIM:  $p < 0.001$ ,  $R = 0.43$ ; Fig. 2a). By the end  
171 of the crowding period, however, the locusts of solitary origin had lost their unique  
172 bacterial composition and displayed a gregarious-like bacterial profile on their  
173 integument (ANOSIM:  $p = 0.34$ ,  $R = 0.005$ ; Fig. 2a1).

174 A constrained canonical analysis and analysis of similarities of the locusts gut bacterial  
175 composition, revealed the same pattern of transition from a distinct solitary gut  
176 microbiota at t=0 (ANOSIM:  $p < 0.001$ ,  $R = 0.51$ ; Fig.2b) to bacterial compositions that

were much closer between solitary and gregarious locusts after seven days of crowding (ANOSIM:  $p=0.037$ ,  $R=0.08$ ; Fig.2b1). Most notably, the genus *Weissella* (Firmicutes) was absent from the gut of solitary locusts at  $t=0$ , whereas it dominated in the gregarious population, contributing considerably to the observed per-phase difference before crowding (Fig.2b, c). In contrast, at  $t=7$  the contribution of *Weissella* to the per-phase separation strongly decreased, as it became prevalent also among the previously solitary locusts (Fig. 2b, c).

Higher-resolution analysis of the data revealed that a specific gregarious-prevalent Amplicon Sequence Variant (ASV) had been acquired by the solitary locusts during the crowding period (Fig.2d), confirming that this is indeed the same bacterium, assigned to the species *Weissella cibaria* (top hit strain: KACC 11862, similarity: 100%), that was transmitted from the gregarious locusts to their solitary conspecifics during the gregarization process.

### ***Microbiome-induced aggregation model***

We consider a fully-mixed population of locusts, each carrying one of three microbiome compositions: a standard solitary microbiome composition (denoted by  $S$ ); the standard microbiome plus microbes of type  $\alpha$  that induce their hosts to aggregate (denoted by  $\alpha$ ) - to initiate more interactions than other hosts by a factor of  $g > 1$ ; and the standard microbiome plus microbes of type  $\beta$  which do not affect their host's behavior (denoted by  $\beta$ ). Locusts can lose microbes  $\alpha$  and  $\beta$  with rates  $L_\alpha, L_\beta$  respectively. We use a compartmental model, as described in the *Methods* section.

We begin by analyzing the model described by equations (1-3, see methods), constructed to examine the possibility of bacterial effects on the behavior of the locusts. We first consider populations with constant density ( $D(t) = 1$  throughout) and without mutations ( $\mu = 0$ ). In this case we find analytical expressions for the equilibrium points of the system and their stability (see details in the Supplementary Information). The analysis revealed that in a competition between  $S$  and  $\beta$  alone,  $\beta$  can evolve and is maintained in polymorphism in frequency of  $1 - \frac{L_\beta}{T_\beta}$  (the frequency of  $S$  would be  $\frac{L_\beta}{T_\beta}$ ).

We thus see that when  $T_\beta \leq L_\beta$ ,  $\beta$  goes extinct. Similarly with  $\alpha$  and  $S$ ,  $\alpha$  can evolve

and be maintained in polymorphism in the frequency of  $1 - \frac{L_\alpha}{T_\alpha \cdot g}$ . In  $\alpha$ 's case, not only the horizontal transmission probability ( $T_\alpha$ ) determines its success, but rather its effective transmission rate ( $T_\alpha \cdot g$ ), combining both the horizontal transmission probability and the induction of interactions rate. When all three types are competing over the population, we find that  $\alpha$  can be maintained in polymorphism with  $S$  if the following two conditions are satisfied:

$$4. T_\alpha \cdot g > L_\alpha$$

$$5. T_\alpha \cdot g > T_\beta \cdot \left( g - \frac{L_\alpha}{T_\alpha} \left( 1 - \frac{1}{g} \right) \right) + L_\alpha - L_\beta$$

See figure 3b-c and the Supplementary Information for the derivations. We find that in the range of conditions in which  $\alpha$  can evolve, its proportion in the population increases with the horizontal transmission advantage ( $T_\alpha/T_\beta$ ) and with the level of aggregation induced by  $\alpha$  ( $g$ ; see figure 3). This result is consistent with the empirical evidence demonstrating that the *Weissella* genus is both associated with aggregation and shows significant horizontal transmission ability.

Following these results, we examined the dynamics in populations that undergo both mutations and changes in their density, e.g. due to variation in the availability of resources. We modeled a population of locusts with density  $D(t)$  that changes along time with a Gaussian wave (starting and ending at  $D = 1$ ). The increase in density directly affects the rate of all interactions in the population, increasing the effective horizontal transmission rate of both microbes,  $\alpha$  and  $\beta$ . We denote by  $\rho$  the swarming level in the population, defined as the average interaction rate, which is affected both by the change in population density ( $D$ ) and by the fold-increase in the interaction rate of  $\alpha$ -bearing hosts ( $g$ ). We find that in this type of population dynamics,  $\alpha$  can spread under a much wider range of conditions, and contribute to the swarming. However, in many cases the invasion of  $\alpha$  is temporary:  $\alpha$  invades the population and spreads rapidly when the density is high enough, generating a crowded swarm; and it then declines and disappears from the population as the density decreases (Fig. 4).

Our model thus predicts that microbes, such as *Weissella* (represented by  $\alpha$  in our model) may “take over” the gregarious population using a combination of two effective mechanisms: the first is by enjoying a higher horizontal transmission rate than its competitors in the locust microbiome ( $T_\alpha > T_\beta$ ); and the second is by eliciting the conspecific interactions (g) (i.e. the conspecific attraction) of infected insects; or, within the locust context, making the individuals more gregarious (Fig. 2).

## Discussion

The density-dependent phase shift of locusts from the solitary to the gregarious phenotype has been widely studied, and shown to include behavioral changes as well as physiological transitions [2,5,6,22]. However, the locust bacterial composition-related aspects of the phenomenon have never been directly investigated.

### *Locust-bacteria phase shift dynamics*

The bacterium *Weissella cibaria* (Firmicutes) has been shown here to dominate the gregarious locust's bacterial composition, and to be transmitted to solitary locusts upon crowding. *Weissella* members have been previously described as dominant gut bacteria in gregarious locusts of several species, and mainly in the migratory locust (*Locusta migratoria*) [23–25] and the desert locust (*S. gregaria*) [13,26]). In Lavy et al. [13] we reported the intriguing pattern of temporal *Weissella* blooms in the gut of laboratory-reared gregarious locusts, while the solitary locusts were shown to maintain a constant bacterial composition dominated by members of the phylum Proteobacteria. The data presented here further demonstrates the ability of this genus to infect and dominate the microbiota of previously naive solitary locust-hosts when entering the gregarious phase. Hence this bacterium is suggested to be instrumental in the crowding-induced shift of the solitary locust gut bacterial composition to a gregarious-like composition, a previously unexplored aspect of locust phase-transformation.

Wada-Katsumata et al. [27] demonstrated that the presence of *W. cibaria* in cockroach feces attracts cockroach nymphs in the vicinity and elicits their aggregation. In light of those and the present findings, we speculate that *W. cibaria* may also benefit from eliciting aggregation behavior among locusts, thereby increasing locust conspecific

encounters and thus also the bacterium's own transmission rate. This is even more plausible when taking into account that, while being very common among gregarious locusts [13,23–26], this bacterium is not vertically transmitted from parent to offspring [26] and thus has to rely on horizontal transmission.

In this study we also describe for the first time the bacterial composition of the locust integument. It contains a large fraction of Proteobacteria and Firmicutes that may be partly gut-derived and a result of the dense conditions in the locust cage; we also report on a fraction of Bacteroidetes and Actinobacteria, which were not found in the fecal samples. Members of the Actinobacteria have been found to function as a first line of insect defense against pathogens.[28–30]. Consequently, we hypothesize that they may also serve the same purpose in contributing to the locust's immunity, though this needs to be validated in further studies.

### ***Insect aggregation behavior can be a bacterial ecological strategy***

We suggest that the microbiome may play an essential role in the locust phase-shift, and that the microbiome has the potential to promote crowding among gregarious populations. Though the controlled manipulations in a laboratory cage cannot of course fully simulate field conditions, the laboratory set-up allowed us to closely monitor individual solitary locusts following their exposure to gregarious populations and consequent phase transformation; a study which could not be achieved in the field (due to the scarce solitary individuals and migrating gregarious swarms). Furthermore, both Dillon et al. [31] and Lavy et al. [13] have shown that the bacterial composition of laboratory locusts is broadly similar to that of field-collected individuals, providing the laboratory data with further ecological relevance.

The ecological relevance of our findings is highlighted by our mathematical model. Using this model we studied the conditions that enable the evolution of an aggregation-inducing microbe ( $\alpha$ ) in a locust population. We found that while benefitting from the advantage of horizontal transmission, a microbe may further benefit from inducing its host to aggregate and increase its rate of interactions, thus enabling more transmission opportunities. This induction can be beneficial even when incurring a certain cost (represented in our model by  $L_\alpha > L_\beta$ ). We have further shown that incorporating changes in population density in the model due to external reasons, in the form of a sinuous increase followed by a decrease, allowed the aggregation-inducing microbe ( $\alpha$ )

to invade the population under a much wider range of conditions. This invasion was shown to be transient, characterized by a rapid spread of microbe  $\alpha$  when the population becomes dense enough, and followed by a decline as population density decreases. The increase in  $\alpha$  in the population in itself further increases the crowding, as  $\alpha$ -bearing locusts tend to aggregate and seek additional interactions.

A solitary-to-gregarious phase-shift in the field is strongly affected by forced crowding, caused by factors such as food patchiness or a drastic population increase [5,6]. Such conditions support and induce conspecific encounters, which potentially increase the bacterial spread within the forming swarm.

As noted, Lavy et al. [13,26] indicated that although *Weissella* seems to spread very quickly in the gregarious population, it is not transmitted across generations, unlike other locust-bacteria. Our model can account for this lack of transmission across generations, if interpreted as multigenerational, considering  $L_\alpha$  and  $L_\beta$ , the transitions from  $\alpha$  and  $\beta$  to  $S$ , and the lack of transitions in the opposite direction. This can represent a population in which  $S$  is a standard microbiome that is also transmitted across generations, while  $\alpha$  and  $\beta$  cannot be transmitted or are less successful in transmitting across generations. Therefore,  $\alpha$  and  $\beta$ -bearing hosts lose a certain proportion to  $S$  hosts (with rates  $L_\alpha$  and  $L_\beta$ ). Such a failure to be transmitted to offspring, could be due to an inability to colonize the younger life stages of the locust, or due to lack of maternal inoculation [26].

### ***Concluding remarks***

We have described here, using empirical experiments and a novel mathematical model, how bacteria of solitary individuals, changes upon crowding. Furthermore, we showed that some bacterial agents that can potentially benefit from the aggregation phenomenon, may play an instrumental part in the locust density-dependent phase-shift, under the controlled conditions of the laboratory. Our findings suggest that this is beneficial for the underlying bacterium, offering it a multitude of additional potential hosts. It should be noted, however, that many questions remain unanswered; and further experiments validating *Weissella*'s potential in inducing aggregation in locusts are required. This is a first description of the dynamics of the locust's microbiota, as its

host undergoes the physiological and behavioral changes associated with phase-transition; and our findings illuminate previously unexplored aspects of this quintessential example of environmentally-induced plasticity. Our findings may also open the way to potentially novel directions in the on-going efforts to battle this ancient and devastating pest.

## References

1. Le Gall M, Overson R, Cease A. A Global Review on Locusts (Orthoptera: Acrididae) and Their Interactions With Livestock Grazing Practices. *Front Ecol Evol.* 2019;7.
2. Ayali A. The puzzle of locust density-dependent phase polyphenism. *Curr Opin Insect Sci.* 2019;35:41–7. Available from: <https://doi.org/10.1016/j.cois.2019.06.008>
3. Zhang L, Lecoq M, Latchininsky A, Hunter D. Locust and Grasshopper Management. *Annu Rev Entomol.* 2019;64:15–34.
4. FAO. (2020). *Desert Locust situation update*. Available from: [www.fao.org/ag/locusts/en/info/info/index.html](http://www.fao.org/ag/locusts/en/info/info/index.html). (Last accessed 17.09.2020)..
5. Pener MP, Simpson SJ. Locust phase polyphenism: an update. *Adv In Insect Phys.* 2009;36:1–272.
6. Cullen DA, Cease AJ, Latchininsky A V., Ayali A, Berry K, Buhl J, et al. From Molecules to Management: Mechanisms and Consequences of Locust Phase Polyphenism. *Adv. In Insect Phys.* Elsevier Ltd.; 2017. Available from: <http://dx.doi.org/10.1016/bs.aiip.2017.06.002>
7. Golov Y, Harari A, Rillich J, Ayali A. Precopulatory behavior and sexual conflict in the desert locust. *PeerJ.* 2018;6:e4356. Available from: <https://peerj.com/articles/4356>
8. Knebel D, Ayali A, Guershon M, Ariel G. Intra- versus intergroup variance in collective behavior. *Sci Adv.* 2019;5:1–10.
9. Ayali A, Pener MP. The relations of adipokinetic response and body lipid content in locusts (*Locusta migratoria migratorioides*) with special reference to phase polymorphism. *J Insect Physiol.* 1995;41:85–9.

- 359 10. Talal S, Ayali A, Gefen E. Discontinuous gas-exchange cycle characteristics are  
360 differentially affected by hydration state and energy metabolism in gregarious  
361 and solitary desert locusts. *J Exp Biol.* 2015;218:3807–15.
- 362 11. Dillon RJ, Vennard CT, Charnley AK. Exploitation of gut bacteria in the locust.  
363 *Nature.* 2000;403:851–2.
- 364 12. Dillon RJ, Vennard CT, Charnley a. K. A Note: Gut bacteria produce components  
365 of a locust cohesion pheromone. *J Appl Microbiol [Internet].* 2002;92:759–63.  
366 Available from: <http://doi.wiley.com/10.1046/j.1365-2672.2002.01581.x>
- 367 13. Lavy O, Gophna U, Gefen E, Ayali A. The effect of density-dependent phase on  
368 the locust gut bacterial composition. *Front Microbiol.* 2019;10:1–8.
- 369 14. Lavy O, Gophna U, Gefen E, Ayali A. Dynamics of bacterial composition in the  
370 locust reproductive tract are affected by the density-dependent phase. *FEMS*  
371 *Microbiol Ecol.* Oxford University Press; 2020;96:1–10.
- 372 15. Dinan TG, Cryan JF. Gut-brain axis in 2016: Brain-gut-microbiota axis-mood,  
373 metabolism and behaviour. *Nat Rev Gastroenterol Hepatol.* Nature Publishing  
374 Group; 2017;14:69–70.
- 375 16. Kraimi N, Dawkins M, Gebhardt-Henrich SG, Velge P, Rychlik I, Volf J, et al.  
376 Influence of the microbiota-gut-brain axis on behavior and welfare in farm  
377 animals: A review. *Physiol Behav.* 2019;210.
- 378 17. Yuval B. Symbiosis: Gut Bacteria Manipulate Host Behaviour. *Curr Biol.*  
379 2017;27:R746–7. Available from:  
380 <http://linkinghub.elsevier.com/retrieve/pii/S096098221730787X>
- 381 18. Liberti J, Engel P. The gut microbiota — brain axis of insects. *Curr Opin Insect*  
382 *Sci.*2020;39:6–13. Available from: <https://doi.org/10.1016/j.cois.2020.01.004>
- 383 19. Lewin-Epstein O, Aharonov R, Hadany L. Microbes can help explain the  
384 evolution of host altruism. *Nat Commun.* 2017;8:1–7.
- 385 20. Lewin-epstein O, Hadany L. Host – microbiome coevolution can promote  
386 cooperation in a rock – paper – scissors dynamics. *Proc R Soc B.*  
387 2020;287:20192754.

- 388 21. Gurevich Y, Lewin-Epstein O, Hadany L. The evolution of paternal care: a role  
389 for microbes? *Philos Trans R Soc Lond B Biol Sci.* 2020;375:20190599.
- 390 22. Pener M., Yerushalmi Y. The physiology of locust phase polymorphism: an  
391 update. *J Insect Physiol.* 1998;44:365–77. Available from:  
392 <http://linkinghub.elsevier.com/retrieve/pii/S0022191097001698>
- 393 23. Shi W, Guo Y, Xu C, Tan S, Miao J, Feng Y, et al. Unveiling the mechanism by  
394 which microsporidian parasites prevent locust swarm behavior. *Proc Natl*  
395 *Acad Sci U S A.* 2014;111:1343–8. Available from:  
396 <http://www.pubmedcentral.nih.gov/articlerender.fcgi?artid=3910566&tool=pmcentrez&rendertype=abstract>  
397
- 398 24. Stoops J, Crauwels S, Waud M, Claes J, Lievens B, Van Campenhout L.  
399 Microbial community assessment of mealworm larvae (*Tenebrio molitor*) and  
400 grasshoppers (*Locusta migratoria migratorioides*) sold for human  
401 consumption. *Food Microbiol.* 2016;53:122–7. Available from:  
402 <http://dx.doi.org/10.1016/j.fm.2015.09.010>
- 403 25. Garofalo C, Osimani A, Milanović V, Taccari M, Cardinali F, Aquilanti L, et al.  
404 The microbiota of marketed processed edible insects as revealed by high-  
405 throughput sequencing. *Food Microbiol.* 2017;62:15–22.
- 406 26. Lavy O, Gophna U, Ayali A, Gihaz S, Fishman A, & Gefen E. The maternal  
407 foam plug constitutes a reservoir for the desert locust's bacterial symbionts.  
408 *BioRxiv [preprint].* September 15, 2020 [cited 2020, September 17]. doi:  
409 <https://doi.org/10.1101/2020.09.15.296319>
- 410 27. Wada-Katsumata A, Zurek L, Nalyanya G, Roelofs WL, Zhang A, Schal C. Gut  
411 bacteria mediate aggregation in the German cockroach. *Proc Natl Acad Sci.*  
412 2015;112:1504031112.
- 413 28. Kaltenpoth M, Wolfgang G, Gudrun H, Erhard S. Symbiotic Bacteria Protect  
414 Wasp Larvae from Fungal Infestation. *Curr Biol.* 2005;15:475–9.
- 415 29. Scott JJ, Oh D-C, Yuceer MC, Klepzig KD, Clardy J, Currie CR. Bacterial  
416 Protection of Beetle-Fungus Mutualism. *Science* (80- ). 2008;322:63–63.  
417 Available from: <http://www.sciencemag.org/cgi/doi/10.1126/science.1160423>

- 418 30. Mattoso TC, Moreira DDO, Samuels RI. Symbiotic bacteria on the cuticle of the  
419 leaf-cutting ant *Acromyrmex subterraneus subterraneus* protect workers from  
420 attack by entomopathogenic fungi. *Biol Lett.* 2012;8:461–4.
- 421 31. Dillon RJ, Webster G, Weightman a J, Dillon VM, Blanford S, Charnley a K.  
422 Composition of Acridid gut bacterial communities as revealed by 16S rRNA  
423 gene analysis. *J Invertebr Pathol.* 2008 [cited 2014 Nov 13];97:265–72.  
424 Available from: <http://www.ncbi.nlm.nih.gov/pubmed/17967463>  
425  
426

## Figures

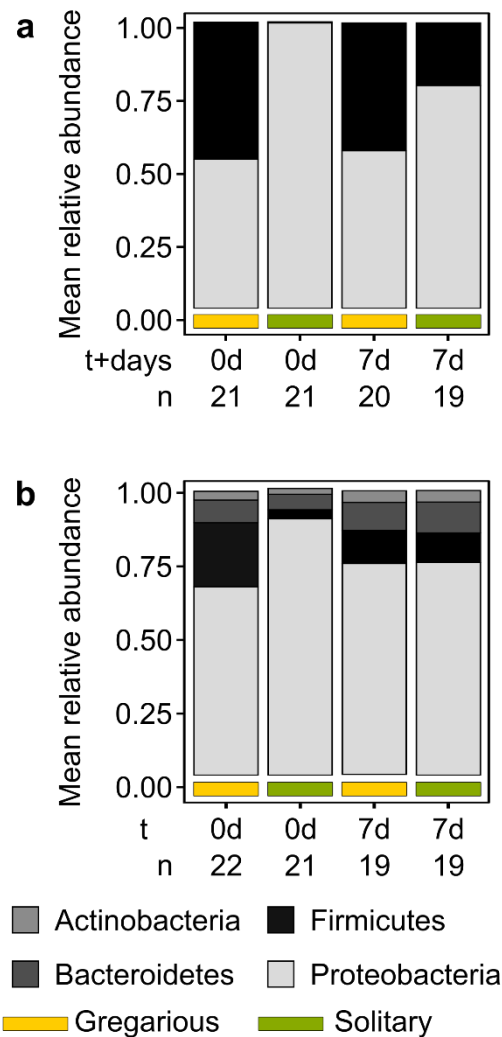

**Figure 1.** Mean relative abundance of the dominant phyla comprising the bacterial composition of the feces (a) and the integument (b) of gregarious (yellow underscore) and solitary (green underscore) individuals at t=0d and at t=7d. It is noticeable that the phylum Firmicutes is absent from the feces of the solitary locusts at t=0 and present after seven days. In addition, while the feces bacteria of both gregarious and solitary locusts feature predominantly Firmicutes and Proteobacteria, the locust's integument is also populated with bacteria from the Actinobacteria and Bacteroidetes phyla.

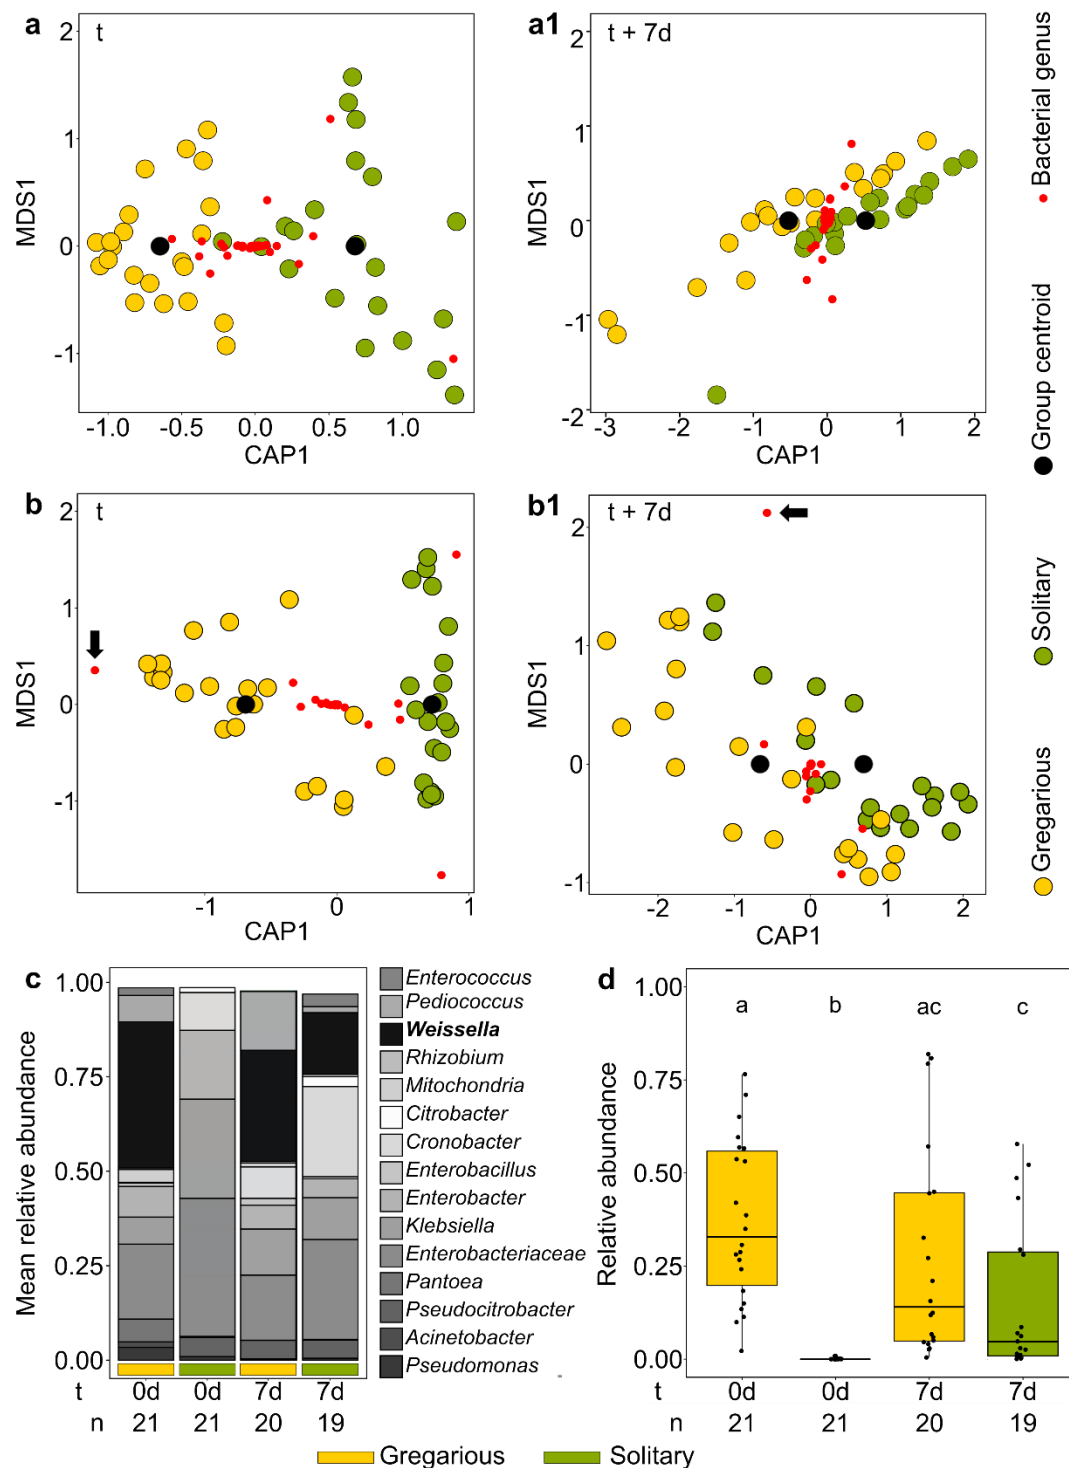

**Figure 2:** Genus level, Bray-Curtis based, Constrained Canonical Analysis of integument bacterial composition according to phase at t=0d (a) and t=7d (a1) and of the feces bacterial composition at t=0d (b) and at t=7d (b1). The axes display the variation of the explanatory variables (i.e. the phase groups). The location of the bacterial genera (red dots) relative to the group centroids represents the between-group variability explained by a specific bacterial genus. At t=0d, the genus *Weissella* (marked with a black arrow) is a main contributor to the between-phase variance (based on its location on the X axis) in the feces bacterial composition (b); whereas, at t=7d it is located almost between the group centroids,

decreasing dramatically in its contribution to the variance (b1). (c) Mean relative abundance of the dominant genera comprising the feces bacterial composition of gregarious (yellow underscore) and solitary (green underscore) at t=0d and at t=7d. It is noticeable that the genus *Weissella* is absent from the solitary treatment at t=0 and present after 7 days. (d) Relative abundance of the dominant Amplicon Sequence Variant (ASV) assigned to the genus *Weissella* in the gregarious and solitary-originated locusts. The *Weissella* assigned ASV was absent from the solitary treatment at t=0 days, whereas at t=7 days there was no significant difference between the two treatments. Differences between the groups were analyzed using Kruskal-Wallis test ( $p < 0.001$ ) and Dunn's test as post-hoc.

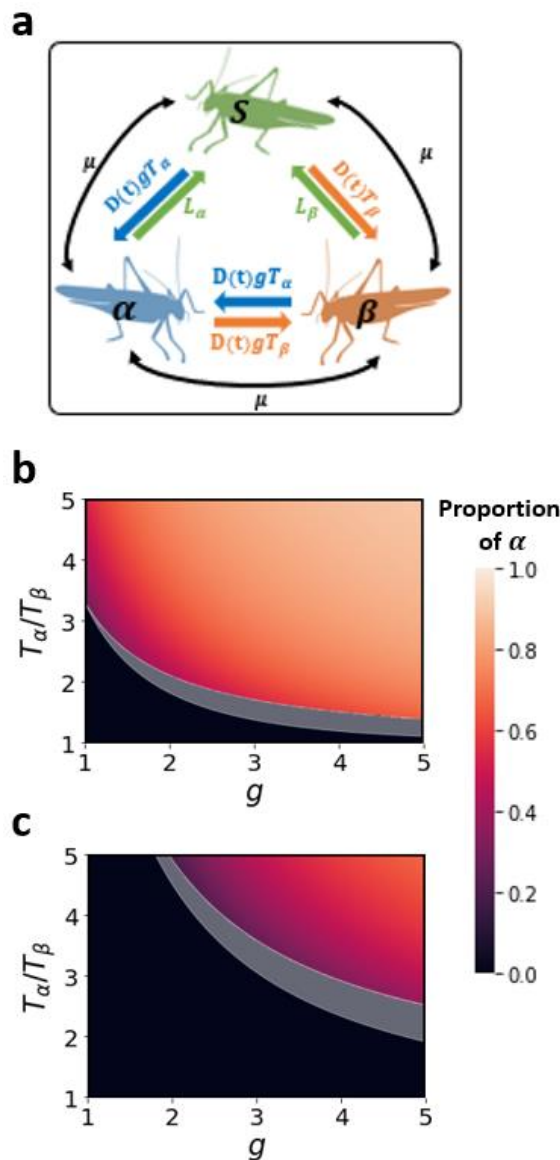

**Figure 3. Model illustration and analytic results.** (a) Illustration of the transition rates between the three microbiome types.  $T_\alpha$  and  $T_\beta$  are the horizontal transmission rates of microbes  $\alpha$  and  $\beta$ .  $g$  is the fold-increase in locust interactions due to the induction of aggregation generated by microbe  $\alpha$ .  $L_\alpha$  and  $L_\beta$  are the rates at which the locusts lose microbes  $\alpha, \beta$  respectively.  $D(t)$  denotes the change in *all* interactions rate due to shifts in population density, while  $\mu$  represents mutations in all possible directions. (b-c) The expected proportion of hosts bearing microbe  $\alpha$  in the population, based on analysis of the equilibria of equations (1-3) and their stability (see Supplementary Information) is plotted for  $L_\alpha = 0.06$  (b) and  $L_\alpha = 0.2$  (c). The black area represents the range of parameters in which  $\alpha$  cannot evolve; the grey area represents the range of parameters in which  $\alpha$  will either become extinct or reach polymorphic equilibrium, depending on the initial conditions of the population; the colored area represents the range of parameters in which  $\alpha$  will evolve and reach stable polymorphism with  $S$ , regardless of the initial conditions of the population.  $T_\beta = 0.025$ ,  $L_\beta = 0.002$ ,  $\mu = 0$ ,  $D = 1$ .

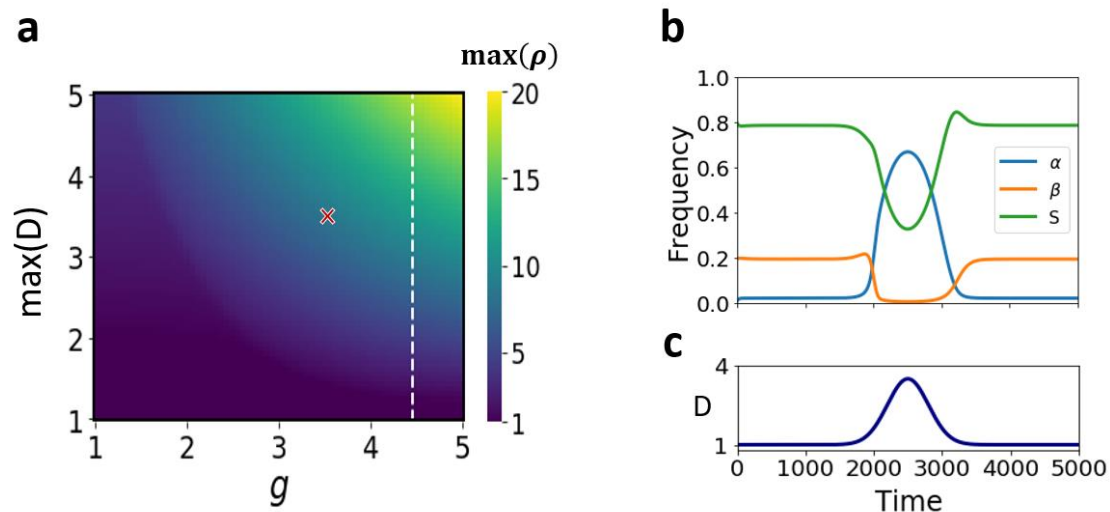

**Figure 4. Temporary increase in the population density enables microbe  $\alpha$  to invade and spread under a wide range of conditions.** (a) Using numerical simulations we analyzed the swarming level in the population ( $\rho$ ), defined as the mean number of interactions per locust:  $\rho = (\beta(t) + S(t)) \cdot D(t) + \alpha(t) \cdot g \cdot D(t)$ . We calculate  $\max_t \rho$  in populations that undergo a Gaussian wave of an increase followed by a decrease in its density, and plot the maximal  $\rho$  as function of  $\alpha$ 's induction of aggregation ( $g$ ) and the population's maximal density ( $\max(D)$ ). The area to the right of the dashed white line represents parameter values for which  $\alpha$  reaches stable polymorphism with  $S$  also if  $D = 1$  throughout, while the area to the left of the dashed white line represents parameter values for which  $\alpha$  is maintained only in mutation-selection balance proportions when  $D = 1$ . The 'x' mark denotes the  $\max(D)$  and  $g$  values used in panels (b-c). (b) We plot a time-series example of the results obtained in one numerical simulation run. The figure shows the proportion of the three microbiome types along time.  $T_\alpha = 0.05, T_\beta = 0.025, L_\alpha = 0.2, L_\beta = 0.02$  (c) The change in population density ( $D$ ) along time. Similar density functions of time were used in all simulations, with the only difference between simulations being the maximal value of  $D$ .
